# Supplementary material
Source: publisher site journal article supplement (https://www.dovepress.com/article/377301)
Supplement: Supplementary file 1 [file get_supplementary_file.php]

**Supplementary materials**

**Supplementary Table S1 Primer sequences used for Quantitative Real-Time PCR**

| Gene | Forward primer | Reverse primer |
| --- | --- | --- |
| IFN-γ | TCGGTAACTGACTTGAATGTCCA | TCGCTTCCCTGTTTTAGCTGC |
| CLC | TCTACTGTGACAATCAAAGGGC | CACGACGACCAAAGCACAC |
| IL-17A | GTATGAGAAAAGTTCAGCCC | TGGTTACGATGTGAAACTTG |
| GAPDH | ACAGTTGCCATGTAGACC | TTGAGCACAGGGTACTTTA |
| RPL13A | GTCTGAAGCCTACAAGAAAG | TGTCAATTTTCTTCTCCACG |

|  | non-T1  (n = 43) | T1  (n = 63) | P  value | non-T2  (n = 27) | T2  (n = 79) | P  value | non-T3  (n = 42) | T3  (n = 64) | P  value |
| --- | --- | --- | --- | --- | --- | --- | --- | --- | --- |
| Atopy (n) | 13 | 25 | 0.319 | 5 | 33 | 0.030 | 14 | 24 | 0.662 |
| Asthma (n) | 15 | 20 | 0.736 | 3 | 32 | 0.005 | 10 | 25 | 0.102 |
| Recurrence (n) | 10 | 20 | 0.341 | 3 | 27 | 0.022 | 12 | 18 | 0.960 |
| Nasal congestion score (mean ± SD) | 6.79 ± 2.24 | 6.79 ± 2.61 | 0.867 | 6.22 ± 2.06 | 7.24 ± 2.34 | 0.033 | 6.55 ± 1.93 | 6.95 ± 2.75 | 0.149 |
| Purulent rhinorrhea score (mean ± SD) | 4.61 ± 2.81 | 4.65 ± 3.09 | 0.810 | 3.56 ± 2.38 | 5.00 ± 3.07 | 0.028 | 4.21 ± 2.55 | 6.16 ± 2.98 | 0.001 |
| Smell loss score (mean ± SD) | 6.84 ± 3.37 | 6.30 ± 3.37 | 0.315 | 6.04 ± 3.37 | 8.01 ± 2.36 | 0.004 | 6.38 ± 3.45 | 6.61 ± 3.34 | 0.864 |
| Headache/facial pain score (mean ± SD) | 1.84 ± 2.73 | 3.44 ± 3.49 | 0.009 | 1.85 ± 2.38 | 2.35 ± 2.96 | 0.617 | 1.81 ± 2.46 | 2.50 ± 3.02 | 0.315 |
| Sneezing score (mean ± SD) | 3.40 ± 2.80 | 3.22 ± 2.62 | 0.802 | 2.07 ± 2.29 | 3.71 ± 2.69 | 0.003 | 3.14 ± 2.82 | 3.39 ± 2.60 | 0.568 |
| Nasal itching score (mean ± SD) | 2.42 ± 2.33 | 2.44 ± 2.79 | 0.520 | 1.33 ± 1.52 | 2.81 ± 2.79 | 0.024 | 2.24 ± 2.28 | 2.56 ± 2.80 | 0.965 |
| Eye itching score (mean ± SD) | 1.54 ± 2.02 | 2.38 ± 2.83 | 0.205 | 1.15 ± 1.85 | 2.34 ± 2.70 | 0.054 | 1.26 ± 1.78 | 2.55 ± 2.86 | 0.035 |
| Total symptom scores (mean ± SD) | 28.53 ± 10.72 | 31.73 ± 12.28 | 0.212 | 23.70 ± 8.48 | 32.73 ± 11.84 | < 0.001 | 26.50 ± 10.18 | 33.02 ± 12.02 | 0.009 |
| Rhinologic score (mean ± SD) | 11.79 ± 4.36 | 11.25 ± 5.56 | 0.597 | 9.89 ± 4.28 | 12.01 ± 5.25 | 0.038 | 11.50 ± 4.45 | 11.45 ± 5.50 | 0.978 |
| Extranasal rhinologic score (mean ± SD) | 3.54 ± 2.86 | 3.81 ± 3.26 | 0.840 | 3.48 ± 3.20 | 3.77 ± 3.07 | 0.585 | 3.31 ± 2.93 | 3.95 ± 3.19 | 0.315 |
| Ear/facial score (mean ± SD) | 2.56 ± 3.30 | 4.24 ± 3.61 | 0.009 | 3.11 ± 2.61 | 3.71 ± 3.84 | 0.860 | 2.64 ± 3.33 | 4.16 ± 3.61 | 0.013 |
| Psychological score (mean ± SD) | 8.14 ± 7.64 | 8.98 ± 7.02 | 0.459 | 7.11 ± 5.53 | 9.17 ± 7.72 | 0.357 | 7.41 ± 7.52 | 9.45 ± 7.01 | 0.096 |
| Sleep dysfunction score (mean ± SD) | 6.49 ± 6.38 | 6.24 ± 5.19 | 0.811 | 4.85 ± 5.42 | 6.85 ± 5.70 | 0.057 | 5.55 ± 5.90 | 6.86 ± 5.51 | 0.150 |
| SNOT-22 total scores (mean ± SD) | 32.51 ± 19.18 | 34.52 ± 18.99 | 0.372 | 28.44 ± 15.91 | 35.51 ± 19.72 | 0.125 | 30.40 ± 19.44 | 35.88 ± 18.54 | 0.054 |
| Lund-Mackay score (mean ± SD) | 16.60 ± 5.36 | 16.43 ± 4.40 | 0.776 | 16.63 ± 4.93 | 16.46 ± 4.77 | 0.725 | 16.17 ± 5.34 | 16.72 ± 4.42 | 0.625 |
| Nasal polyp score (mean ± SD) | 5.42 ± 1.72 | 5.10 ± 1.77 | 0.333 | 5.04 ± 1.91 | 5.29 ± 1.70 | 0.549 | 5.12 ± 1.63 | 5.30 ± 1.83 | 0.570 |

**Supplementary Table S2 Comparisons of clinical characteristics in specific inflammatory endotypes**

|  | T1 | | | T2 | | | T3 | | |
| --- | --- | --- | --- | --- | --- | --- | --- | --- | --- |
|  | OR | 95% CI | P value | OR | 95% CI | P value | OR | 95% CI | P value |
| Nasal congestion | 1.00 | 0.84 - 1.21 | 0.959 | 1.20 | 0.96 - 1.50 | 0.104 | 1.15 | 0.96 - 1.38 | 0.138 |
| Purulent rhinorrhea | 1.14 | 0.98 - 1.31 | 0.089 | 1.16 | 0.98 - 1.37 | 0.092 | 1.29 | 1.10 - 1.50 | 0.001 |
| Smell loss | 1.01 | 0.86 - 1.18 | 0.936 | 1.22 | 1.03 - 1.45 | 0.025 | 1.11 | 0.95 - 1.30 | 0.172 |
| Headache/facial pain | 1.18 | 1.01 - 1.38 | 0.039 | 1.01 | 0.86 - 1.20 | 0.879 | 1.14 | 0.98 - 1.32 | 0.090 |
| Sneezing | 1.00 | 0.85 - 1.17 | 0.966 | 1.31 | 0.95 - 1.63 | 0.078 | 1.03 | 0.89 - 1.20 | 0.677 |
| Nasal itching | 1.05 | 0.89 - 1.23 | 0.594 | 1.26 | 0.99 - 1.61 | 0.060 | 1.06 | 0.90 - 1.25 | 0.499 |
| Eye itching | 1.21 | 0.91 - 1.46 | 0.060 | 1.21 | 0.97 - 1.52 | 0.095 | 1.28 | 0.96 - 1.55 | 0.061 |

**Supplementary Table S3 Comparisons of endotype-phenotype associations in specific inflammatory endotypes**

**Supplementary Table S4 Comparisons of clinical characteristics in single, mixed and untypeable inflammatory endotypes**

|  | Tun  (n = 10) | T2 single  (n = 25) | P  value | T1/2  (n = 5) | P  value | T1/3  (n = 13) | P  value | T2/3  (n = 6) | P  value | T1/2/3  (n = 43) | P  value |
| --- | --- | --- | --- | --- | --- | --- | --- | --- | --- | --- | --- |
| Atopy (n) | 2 | 6 | 0.799 | 3 | 0.121 | 4 | 0.560 | 4 | 0.062 | 16 | 0.301 |
| Asthma (n) | 1 | 15 | 0.007 | 2 | 0.171 | 1 | 0.846 | 5 | 0.003 | 16 | 0.097 |
| Recurrence (n) | 2 | 6 | 0.799 | 2 | 0.409 | 0 | 0.092 | 2 | 0.551 | 16 | 0.301 |
| Nasal congestion score (mean ± SD) | 6.00 ± 2.31 | 7.00 ± 1.83 | 0.336 | 6.00 ± 1.41 | 0.613 | 6.54 ± 2.07 | 0.592 | 9.00 ± 1.10 | 0.002 | 7.28 ± 2.69 | 0.121 |
| Purulent rhinorrhea score (mean ± SD) | 3.10 ± 1.85 | 4.76 ± 2.68 | 0.094 | 4.00 ± 3.08 | 0.602 | 5.08 ± 3.12 | 0.139 | 7.67 ± 3.01 | 0.007 | 6.28 ± 2.93 | 0.001 |
| Smell loss score (mean ± SD) | 4.60 ± 3.37 | 8.32 ± 2.39 | 0.001 | 6.00 ± 2.65 | 0.421 | 6.85 ± 3.11 | 0.115 | 8.67 ± 1.75 | 0.021 | 7.98 ± 2.34 | 0.002 |
| Headache/facial pain score (mean ± SD) | 1.90 ± 2.38 | 1.40 ± 2.45 | 0.369 | 3.40 ± 2.41 | 0.279 | 2.77 ± 3.27 | 0.674 | 4.17 ± 3.87 | 0.252 | 3.47 ± 3.62 | 0.282 |
| Sneezing score (mean ± SD) | 2.20 ± 2.97 | 3.84 ± 2.59 | 0.036 | 2.80 ± 3.27 | 0.736 | 2.23 ± 1.96 | 0.663 | 3.83 ± 3.60 | 0.529 | 3.72 ± 2.63 | 0.051 |
| Nasal itching score (mean ± SD) | 1.90 ± 0.99 | 2.48 ± 2.49 | 0.916 | 2.60 ± 3.29 | 0.984 | 1.23 ± 1.88 | 0.051 | 3.67 ± 3.20 | 0.367 | 2.91 ± 2.91 | 0.737 |
| Eye itching score (mean ± SD) | 1.00 ± 1.41 | 1.32 ± 1.82 | 0.931 | 1.40 ± 2.61 | 0.944 | 1.39 ± 2.29 | 0.901 | 3.83 ± 2.56 | 0.027 | 2.84 ± 2.98 | 0.107 |
| Total symptom scores (mean ± SD) | 20.70 ± 8.45 | 29.12 ± 9.62 | 0.011 | 26.20 ± 14.46 | 0.567 | 26.08 ± 9.28 | 0.126 | 40.83 ± 8.75 | 0.002 | 34.47 ± 12.37 | < 0.001 |
| Rhinologic score (mean ± SD) | 9.10 ± 3.87 | 12.68 ± 4.38 | 0.026 | 11.80 ± 4.55 | 0.349 | 10.38 ± 4.91 | 0.551 | 12.33 ± 4.59 | 0.156 | 11.60 ± 5.95 | 0.155 |
| Extranasal rhinologic score (mean ± SD) | 3.30 ± 2.54 | 3.48 ± 2.86 | 0.978 | 1.60 ± 1.67 | 0.218 | 3.08 ± 3.10 | 0.793 | 3.67 ± 3.62 | 0.974 | 4.21 ± 3.20 | 0.481 |
| Ear/facial score (mean ± SD) | 2.10 ± 1.79 | 2.52 ± 3.83 | 0.407 | 3.80 ± 2.68 | 0.220 | 4.08 ± 2.63 | 0.065 | 4.00 ± 3.35 | 0.285 | 4.35 ± 3.97 | 0.136 |
| Psychological score (mean ± SD) | 5.30 ± 5.19 | 8.44 ± 8.43 | 0.430 | 5.20 ± 5.36 | 0.951 | 8.08 ± 5.31 | 0.223 | 12.17 ± 7.96 | 0.077 | 9.63 ± 7.48 | 0.090 |
| Sleep dysfunction score (mean ± SD) | 3.80 ± 4.16 | 7.20 ± 6.68 | 0.191 | 2.60 ± 1.95 | 0.933 | 5.69 ± 6.09 | 0.481 | 7.33 ± 7.79 | 0.380 | 7.07 ± 5.00 | 0.049 |
| SNOT-22 total scores (mean ± SD) | 23.60 ± 13.03 | 34.32 ± 21.84 | 0.444 | 25.00 ± 11.81 | 0.928 | 31.31 ± 16.91 | 0.276 | 39.50 ± 14.38 | 0.042 | 36.86 ± 19.83 | 0.032 |
| Lund-Mackay score (mean ± SD) | 14.70 ± 5.60 | 16.88 ± 5.42 | 0.341 | 14.60 ± 5.55 | 0.951 | 18.31 ± 4.55 | 0.131 | 19.67 ± 4.59 | 0.140 | 15.98 ± 4.22 | 0.586 |
| Nasal polyp score (mean ± SD) | 4.80 ± 1.81 | 5.44 ± 1.53 | 0.195 | 4.60 ± 1.34 | 0.955 | 5.08 ± 1.94 | 0.654 | 5.83 ± 2.32 | 0.320 | 5.21 ± 1.75 | 0.445 |
